# Supplementary material
Source: PubMed Central journal article supplement (PMC5911180)
Supplement: NIHMS928816-supplement-Supp_info.pdf [file NIHMS928816-supplement-Supp_info.pdf]

# Template-based and free modeling of I-TASSER and QUARK pipelines using predicted contact maps in CASP12

Chengxin Zhang, S. M. Mortuza, Baoji He, Yanting Wang, Yang Zhang

## Supplemental Materials

**Table S1.** Comparison of template quality before and after QUARK-based sorting using domains defined by CASP12 accessors. The number outside parentheses is TM-score, while the number inside parenthesis is GDT\_TS.

| target domain | "QUARK" with contact |                     | QUARK without contact |                     |
|---------------|----------------------|---------------------|-----------------------|---------------------|
|               | first model          | best model in top 5 | first model           | best model in top 5 |
| T0859-D1      | 0.26 (25)            | 0.28 (27)           | 0.23 (24)             | 0.26 (26)           |
| T0862-D1      | 0.37 (41)            | 0.54 (59)           | 0.41 (40)             | 0.50 (50)           |
| T0863-D1      | 0.30 (23)            | 0.30 (23)           | 0.25 (21)             | 0.27 (22)           |
| T0864-D1      | 0.19 (13)            | 0.36 (22)           | 0.23 (14)             | 0.23 (14)           |
| T0866-D1      | 0.49 (46)            | 0.56 (56)           | 0.32 (33)             | 0.47 (47)           |
| T0869-D1      | 0.32 (36)            | 0.34 (36)           | 0.25 (26)             | 0.27 (27)           |
| T0870-D1      | 0.21 (21)            | 0.39 (34)           | 0.21 (20)             | 0.28 (26)           |
| T0878-D1      | 0.20 (12)            | 0.20 (12)           | 0.15 (9)              | 0.17 (10)           |
| T0880-D2      | 0.23 (16)            | 0.24 (19)           | 0.20 (15)             | 0.23 (19)           |
| T0886-D1      | 0.29 (36)            | 0.35 (41)           | 0.28 (33)             | 0.30 (35)           |
| T0886-D2      | 0.41 (35)            | 0.47 (41)           | 0.36 (32)             | 0.38 (34)           |
| T0888-D1      | 0.25 (22)            | 0.26 (22)           | 0.19 (18)             | 0.22 (20)           |
| T0890-D1      | 0.56 (62)            | 0.61 (63)           | 0.47 (51)             | 0.57 (60)           |
| T0892-D1      | 0.74 (76)            | 0.74 (76)           | 0.78 (80)             | 0.78 (80)           |
| T0892-D2      | 0.33 (31)            | 0.51 (48)           | 0.35 (33)             | 0.35 (34)           |
| T0894-D2      | 0.60 (73)            | 0.60 (73)           | 0.55 (69)             | 0.55 (69)           |
| T0896-D1      | 0.20 (20)            | 0.56 (55)           | 0.16 (17)             | 0.18 (18)           |
| T0896-D2      | 0.56 (46)            | 0.56 (46)           | 0.21 (15)             | 0.22 (16)           |
| T0896-D3      | 0.19 (14)            | 0.20 (15)           | 0.17 (13)             | 0.18 (13)           |
| T0897-D1      | 0.24 (19)            | 0.24 (21)           | 0.28 (25)             | 0.28 (25)           |
| T0897-D2      | 0.59 (52)            | 0.59 (52)           | 0.22 (21)             | 0.23 (21)           |
| T0898-D1      | 0.35 (33)            | 0.39 (39)           | 0.39 (36)             | 0.39 (36)           |
| T0899-D1      | 0.50 (35)            | 0.59 (41)           | 0.18 (11)             | 0.20 (13)           |
| T0900-D1      | 0.43 (42)            | 0.43 (42)           | 0.35 (32)             | 0.36 (34)           |
| T0901-D1      | 0.57 (43)            | 0.66 (49)           | 0.23 (15)             | 0.23 (15)           |
| T0904-D1      | 0.45 (37)            | 0.46 (39)           | 0.42 (31)             | 0.48 (34)           |
| T0905-D1      | 0.53 (38)            | 0.59 (43)           | 0.18 (13)             | 0.24 (15)           |
| T0912-D1      | 0.72 (54)            | 0.74 (56)           | 0.16 (6)              | 0.17 (7)            |
| T0914-D1      | 0.33 (31)            | 0.34 (32)           | 0.29 (25)             | 0.32 (31)           |
| T0914-D2      | 0.32 (27)            | 0.35 (30)           | 0.31 (25)             | 0.35 (29)           |
| T0915-D1      | 0.49 (42)            | 0.51 (42)           | 0.46 (39)             | 0.46 (39)           |
| T0918-D1      | 0.49 (46)            | 0.49 (46)           | 0.32 (28)             | 0.33 (31)           |
| T0918-D2      | 0.39 (34)            | 0.42 (37)           | 0.28 (26)             | 0.30 (28)           |
| T0918-D3      | 0.45 (40)            | 0.50 (45)           | 0.24 (23)             | 0.35 (30)           |
| T0923-D1      | 0.20 (17)            | 0.20 (18)           | 0.12 (11)             | 0.21 (18)           |
| T0941-D1      | 0.21 (9)             | 0.21 (11)           | 0.16 (8)              | 0.18 (9)            |
| T0946-D2      | 0.74 (59)            | 0.74 (59)           | 0.26 (18)             | 0.26 (18)           |

**Table S2.** Comparison between quality of the first model for “hard” and “very hard” targets generated by QUARK with NeBcon predicted contacts (“QUARK” server group in CASP12) and that by original QUARK without contacts (post-CASP experiment). The number outside parentheses is TM-score, while the number inside parenthesis is GDT\_TS. The domains are defined from the CASP12 assessors.

| target domain | LOMETS templates before sorting |                         | Template after sorting (excluding QUARK models) |                         | Template after sorting (including QUARK models) |                         |
|---------------|---------------------------------|-------------------------|-------------------------------------------------|-------------------------|-------------------------------------------------|-------------------------|
|               | first template                  | best template in top 20 | first template                                  | best template in top 20 | first template                                  | best template in top 20 |
| T0859-D1      | 0.25 (25)                       | 0.27 (25)               | 0.18 (18)                                       | 0.29 (27)               | 0.26 (25)                                       | 0.29 (27)               |
| T0862-D1      | 0.41 (48)                       | 0.49 (51)               | 0.40 (41)                                       | 0.41 (42)               | 0.37 (41)                                       | 0.41 (42)               |
| T0863-D1      | 0.17 (16)                       | 0.27 (22)               | 0.23 (18)                                       | 0.27 (22)               | 0.30 (23)                                       | 0.30 (23)               |
| T0864-D1      | 0.13 (8)                        | 0.18 (12)               | 0.17 (11)                                       | 0.21 (13)               | 0.19 (13)                                       | 0.22 (14)               |
| T0866-D1      | 0.40 (40)                       | 0.46 (45)               | 0.46 (45)                                       | 0.47 (45)               | 0.49 (46)                                       | 0.49 (46)               |
| T0869-D1      | 0.20 (22)                       | 0.36 (36)               | 0.32 (32)                                       | 0.34 (34)               | 0.32 (36)                                       | 0.34 (36)               |
| T0870-D1      | 0.18 (17)                       | 0.38 (34)               | 0.35 (31)                                       | 0.44 (37)               | 0.21 (21)                                       | 0.44 (37)               |
| T0878-D1      | 0.12 (7)                        | 0.16 (9)                | 0.12 (7)                                        | 0.16 (9)                | 0.20 (12)                                       | 0.20 (12)               |
| T0880-D2      | 0.16 (13)                       | 0.37 (31)               | 0.19 (14)                                       | 0.19 (14)               | 0.23 (16)                                       | 0.23 (17)               |
| T0886-D1      | 0.19 (24)                       | 0.27 (33)               | 0.24 (28)                                       | 0.28 (33)               | 0.29 (36)                                       | 0.29 (36)               |
| T0886-D2      | 0.17 (18)                       | 0.41 (38)               | 0.41 (38)                                       | 0.41 (38)               | 0.41 (35)                                       | 0.41 (38)               |
| T0888-D1      | 0.14 (13)                       | 0.30 (30)               | 0.19 (17)                                       | 0.30 (30)               | 0.25 (22)                                       | 0.30 (30)               |
| T0890-D1      | 0.09 (11)                       | 0.48 (50)               | 0.39 (49)                                       | 0.54 (57)               | 0.56 (62)                                       | 0.56 (62)               |
| T0892-D1      | 0.26 (33)                       | 0.55 (61)               | 0.60 (64)                                       | 0.60 (64)               | 0.74 (76)                                       | 0.74 (76)               |
| T0892-D2      | 0.33 (32)                       | 0.44 (41)               | 0.29 (28)                                       | 0.44 (41)               | 0.33 (31)                                       | 0.44 (41)               |
| T0894-D2      | 0.39 (53)                       | 0.41 (53)               | 0.34 (50)                                       | 0.39 (53)               | 0.60 (73)                                       | 0.60 (73)               |
| T0896-D1      | 0.50 (50)                       | 0.57 (56)               | 0.17 (17)                                       | 0.18 (19)               | 0.20 (20)                                       | 0.20 (20)               |
| T0896-D2      | 0.56 (48)                       | 0.56 (48)               | 0.56 (48)                                       | 0.56 (48)               | 0.56 (46)                                       | 0.56 (48)               |
| T0896-D3      | 0.12 (10)                       | 0.18 (14)               | 0.16 (13)                                       | 0.18 (14)               | 0.19 (14)                                       | 0.19 (14)               |
| T0897-D1      | 0.15 (14)                       | 0.21 (19)               | 0.19 (16)                                       | 0.27 (22)               | 0.24 (19)                                       | 0.27 (22)               |
| T0897-D2      | 0.45 (41)                       | 0.45 (41)               | 0.49 (45)                                       | 0.49 (45)               | 0.59 (52)                                       | 0.59 (52)               |
| T0898-D1      | 0.23 (23)                       | 0.25 (26)               | 0.26 (26)                                       | 0.31 (30)               | 0.35 (33)                                       | 0.37 (38)               |
| T0899-D1      | 0.59 (41)                       | 0.59 (41)               | 0.59 (41)                                       | 0.59 (41)               | 0.50 (35)                                       | 0.59 (41)               |
| T0900-D1      | 0.23 (23)                       | 0.45 (45)               | 0.45 (45)                                       | 0.45 (45)               | 0.43 (42)                                       | 0.45 (45)               |
| T0901-D1      | 0.63 (48)                       | 0.63 (48)               | 0.63 (48)                                       | 0.63 (48)               | 0.57 (43)                                       | 0.65 (49)               |
| T0904-D1      | 0.44 (36)                       | 0.44 (36)               | 0.44 (36)                                       | 0.44 (36)               | 0.45 (37)                                       | 0.45 (37)               |
| T0905-D1      | 0.62 (46)                       | 0.62 (46)               | 0.51 (37)                                       | 0.53 (38)               | 0.53 (38)                                       | 0.59 (42)               |
| T0912-D1      | 0.74 (58)                       | 0.74 (58)               | 0.48 (35)                                       | 0.74 (58)               | 0.72 (54)                                       | 0.74 (58)               |
| T0914-D1      | 0.18 (16)                       | 0.26 (22)               | 0.25 (22)                                       | 0.28 (25)               | 0.33 (31)                                       | 0.33 (31)               |
| T0914-D2      | 0.16 (15)                       | 0.26 (21)               | 0.21 (17)                                       | 0.32 (28)               | 0.32 (27)                                       | 0.32 (28)               |
| T0915-D1      | 0.30 (24)                       | 0.48 (39)               | 0.43 (36)                                       | 0.50 (41)               | 0.49 (42)                                       | 0.51 (42)               |
| T0918-D1      | 0.29 (30)                       | 0.42 (41)               | 0.40 (37)                                       | 0.42 (41)               | 0.49 (46)                                       | 0.49 (46)               |
| T0918-D2      | 0.33 (30)                       | 0.40 (35)               | 0.34 (32)                                       | 0.38 (34)               | 0.39 (34)                                       | 0.39 (34)               |
| T0918-D3      | 0.28 (24)                       | 0.34 (33)               | 0.36 (33)                                       | 0.38 (34)               | 0.45 (40)                                       | 0.45 (40)               |
| T0923-D1      | 0.14 (12)                       | 0.16 (13)               | 0.18 (15)                                       | 0.20 (16)               | 0.20 (17)                                       | 0.20 (17)               |
| T0941-D1      | 0.09 (6)                        | 0.19 (8)                | 0.16 (7)                                        | 0.19 (10)               | 0.21 (9)                                        | 0.21 (10)               |
| T0946-D2      | 0.69 (55)                       | 0.69 (55)               | 0.69 (55)                                       | 0.69 (55)               | 0.74 (59)                                       | 0.74 (59)               |
